# Supplementary material
Source: bioRxiv or medRxiv preprint supplement (https://medrxiv.org/highwire/filestream/78848/field_highwire_adjunct_files/0/2020.04.28.20083295-1.pdf)

## **Modifiable and non-modifiable risk factors for COVID-19: results from UK Biobank**

Frederick K Ho<sup>\*1</sup>, Carlos A Celis-Morales<sup>\*1,2</sup>, Stuart R Gray, S Vittal Katikireddi<sup>1</sup>, Claire L Niedzwiedz<sup>1</sup>, Claire Hastie<sup>1</sup>, Donald M Lyall<sup>1</sup>, Lyn D Ferguson<sup>2</sup>, Colin Berry<sup>2</sup>, Daniel F Mackay<sup>1</sup>, Jason MR Gill<sup>2</sup>, Jill P Pell<sup>\*\*1</sup>, Naveed Sattar MD<sup>\*\*2</sup>, Paul Welsh<sup>\*\*2</sup>

\*Joint first authors

\*\*Joint senior

**SUPPLEMENTARY MATERIAL**

**SUPPLEMENTARY MATERIAL**

**Supplementary Table 1.** Univariable association of baseline risk factors pneumonia and influenza occurring any time after baseline

|                                 | Covid-19 (positive test in all settings) |                |      |          | Pneumonia (after baseline) |                |      |          | Flu (after baseline) |                |      |          |
|---------------------------------|------------------------------------------|----------------|------|----------|----------------------------|----------------|------|----------|----------------------|----------------|------|----------|
|                                 | No<br>n=285417                           | Yes<br>n=400   | RR*  | P        | No<br>n=114462             | Yes<br>n=3486  | RR*  | P        | No<br>n=116283       | Yes<br>n=1665  | RR*  | P        |
| Age (years)                     | 56.15 (8.12)                             | 57.49 (8.60)   | 1.19 | 0.0010   | 56.22 (8.09)               | 56.84 (8.20)   | 1.08 | < 0.0001 | 56.25 (8.09)         | 55.17 (8.15)   | 0.88 | < 0.0001 |
| Age categories (years)          |                                          |                |      | < 0.0001 |                            |                |      | < 0.0001 |                      |                |      | < 0.0001 |
| <50                             | 71199 (24.95)                            | 95 (23.75)     | 1    | REF      | 28203 (24.64)              | 804 (23.06)    | 1    | REF      | 28532 (24.54)        | 475 (28.53)    | 1    | REF      |
| 50-54                           | 44689 (15.66)                            | 49 (12.25)     | 0.82 | 0.26     | 17826 (15.57)              | 460 (13.20)    | 0.91 | 0.09     | 17998 (15.48)        | 288 (17.30)    | 0.96 | 0.60     |
| 55-59                           | 51234 (17.95)                            | 57 (14.25)     | 0.83 | 0.28     | 20622 (18.02)              | 620 (17.79)    | 1.05 | 0.33     | 20938 (18.01)        | 304 (18.26)    | 0.87 | 0.06     |
| 60-64                           | 67550 (23.67)                            | 87 (21.75)     | 0.97 | 0.81     | 27440 (23.97)              | 895 (25.67)    | 1.14 | 0.006    | 27973 (24.06)        | 362 (21.74)    | 0.78 | 0.0003   |
| ≥65                             | 50745 (17.78)                            | 112 (28.00)    | 1.65 | 0.0003   | 20371 (17.80)              | 707 (20.28)    | 1.21 | 0.0002   | 20842 (17.92)        | 236 (14.17)    | 0.68 | < 0.0001 |
| Male sex, n (%)                 | 131359 (46.02)                           | 230 (57.50)    | 1.59 | < 0.0001 | 53187 (46.47)              | 999 (28.66)    | 0.47 | < 0.0001 | 53500 (46.01)        | 686 (41.20)    | 0.82 | < 0.0001 |
| Ethnicity, n (%)                |                                          |                |      | < 0.0001 |                            |                |      | 0.006    |                      |                |      | < 0.0001 |
| White                           | 270315 (94.71)                           | 352 (88.00)    | 1    | REF      | 108959 (95.19)             | 3299 (94.64)   | 1    | REF      | 110742 (95.23)       | 1516 (91.05)   | 1    | REF      |
| Black                           | 4153 ( 1.46)                             | 23 ( 5.75)     | 4.24 | < 0.0001 | 1221 ( 1.07)               | 49 ( 1.41)     | 1.31 | 0.055    | 1247 ( 1.07)         | 23 ( 1.38)     | 1.34 | 0.16     |
| South Asian                     | 4699 ( 1.65)                             | 9 ( 2.25)      | 1.47 | 0.25     | 2144 ( 1.87)               | 86 ( 2.47)     | 1.31 | 0.01     | 2159 ( 1.86)         | 71 ( 4.26)     | 2.36 | < 0.0001 |
| Others                          | 6250 ( 2.19)                             | 16 ( 4.00)     | 1.96 | 0.008    | 2138 ( 1.87)               | 52 ( 1.49)     | 0.81 | 0.12     | 2135 ( 1.84)         | 55 ( 3.30)     | 1.86 | < 0.0001 |
| Deprivation index (score)       | -1.40 (3.01)                             | -0.25 (3.45)   | 1.39 | < 0.0001 | -1.45 (2.92)               | -1.11 (3.12)   | 1.12 | < 0.0001 | -1.45 (2.92)         | -1.00 (3.17)   | 1.16 | < 0.0001 |
| Current/former smoker, n (%)    | 126151 (44.20)                           | 226 (56.50)    | 1.64 | < 0.0001 | 50503 (44.12)              | 1675 (48.05)   | 1.17 | < 0.0001 | 51382 (44.19)        | 796 (47.81)    | 1.15 | 0.003    |
| Alcohol drinking status, n (%)  |                                          |                |      | 0.004    |                            |                |      | < 0.0001 |                      |                |      | 0.02     |
| Never                           | 11981 ( 4.20)                            | 21 ( 5.25)     | 1    | REF      | 4840 ( 4.23)               | 210 ( 6.02)    | 1    | REF      | 4967 ( 4.27)         | 83 ( 4.98)     | 1    | REF      |
| Former                          | 9257 ( 3.24)                             | 24 ( 6.00)     | 1.48 | 0.19     | 3726 ( 3.26)               | 181 ( 5.19)    | 1.11 | 0.28     | 3835 ( 3.30)         | 72 ( 4.32)     | 1.12 | 0.47     |
| Current                         | 264179 (92.56)                           | 355 (88.75)    | 0.77 | 0.24     | 105896 (92.52)             | 3095 (88.78)   | 0.68 | < 0.0001 | 107481 (92.43)       | 1510 (90.69)   | 0.84 | 0.13     |
| BMI (kg/m <sup>2</sup> )        | 27.27 (4.60)                             | 29.06 (5.27)   | 1.39 | < 0.0001 | 27.36 (4.60)               | 27.82 (5.02)   | 1.10 | < 0.0001 | 27.37 (4.61)         | 27.68 (4.81)   | 1.07 | 0.007    |
| BMI categories, n (%)           |                                          |                |      | < 0.0001 |                            |                |      | < 0.0001 |                      |                |      | 0.008    |
| Underweight                     | 95852 (33.58)                            | 85 (21.25)     | 0.91 | 0.92     | 37470 (32.74)              | 1100 (31.55)   | 1.07 | 0.79     | 38043 (32.72)        | 527 (31.65)    | 0.45 | 0.16     |
| Normal                          | 1245 ( 0.44)                             | 1 ( 0.25)      | 1    | REF      | 476 ( 0.42)                | 15 ( 0.43)     | 1    | REF      | 488 ( 0.42)          | 3 ( 0.18)      | 1    | REF      |
| Overweight                      | 121831 (42.69)                           | 176 (44.00)    | 1.63 | 0.0002   | 49124 (42.92)              | 1382 (39.64)   | 0.96 | 0.30     | 49826 (42.85)        | 680 (40.84)    | 0.99 | 0.80     |
| Obese                           | 66489 (23.30)                            | 138 (34.50)    | 2.34 | < 0.0001 | 27392 (23.93)              | 989 (28.37)    | 1.22 | < 0.0001 | 27926 (24.02)        | 455 (27.33)    | 1.17 | 0.01     |
| Body fat-free mass (Kg)         | 53.44 (11.46)                            | 56.59 (11.54)  | 1.30 | < 0.0001 | 53.52 (11.49)              | 50.23 (10.58)  | 0.74 | < 0.0001 | 53.43 (11.48)        | 52.60 (11.25)  | 0.93 | 0.003    |
| Body fat mass (Kg)              | 24.48 ( 9.23)                            | 27.23 (10.44)  | 1.30 | < 0.0001 | 24.63 (9.25)               | 26.56 (9.88)   | 1.20 | < 0.0001 | 24.67 (9.27)         | 25.44 (9.70)   | 1.08 | 0.0008   |
| Body fat proportion (percent)   | 31.10 (8.42)                             | 32.02 (8.34)   | 1.11 | 0.03     | 31.20 (8.44)               | 34.06 (8.26)   | 1.39 | < 0.0001 | 31.28 (8.45)         | 32.18 (8.46)   | 1.11 | < 0.0001 |
| Systolic blood pressure (mmHg)  | 137.15 (18.14)                           | 139.39 (18.85) | 1.13 | 0.01     | 137.50 (18.20)             | 135.93 (17.77) | 0.92 | < 0.0001 | 137.49 (18.20)       | 134.79 (17.85) | 0.86 | < 0.0001 |
| Diastolic blood pressure (mmHg) | 82.01 ( 9.92)                            | 83.57 (10.59)  | 1.17 | 0.002    | 82.16 (9.94)               | 81.20 (9.60)   | 0.91 | < 0.0001 | 82.14 ( 9.92)        | 81.20 (10.22)  | 0.91 | 0.0001   |
| FEV1 (litres)                   | 2.75 (0.77)                              | 2.66 (0.75)    | 0.88 | 0.02     | 2.76 (0.77)                | 2.47 (0.73)    | 0.68 | < 0.0001 | 2.75 (0.77)          | 2.62 (0.79)    | 0.84 | < 0.0001 |
| FVC (litres)                    | 3.64 (0.98)                              | 3.55 (0.94)    | 0.92 | 0.09     | 3.64 (0.99)                | 3.29 (0.91)    | 0.69 | < 0.0001 | 3.63 (0.99)          | 3.47 (0.98)    | 0.84 | < 0.0001 |
| FEV1/FVC                        | 0.76 (0.07)                              | 0.75 (0.08)    | 0.89 | 0.02     | 0.76 (0.07)                | 0.75 (0.08)    | 0.92 | < 0.0001 | 0.76 (0.07)          | 0.75 (0.08)    | 0.95 | 0.04     |

|                                                |                     |                     |      |          |                     |                     |      |          |                     |                     |          |          |
|------------------------------------------------|---------------------|---------------------|------|----------|---------------------|---------------------|------|----------|---------------------|---------------------|----------|----------|
| Walking pace, n (%)                            |                     |                     |      | < 0.0001 |                     |                     |      | < 0.0001 |                     |                     | < 0.0001 |          |
| Slow                                           | 150551 (52.75)      | 220 (55.00)         | 2.22 | < 0.0001 | 60364 (52.74)       | 1899 (54.48)        | 1.73 | < 0.0001 | 61357 (52.77)       | 906 (54.41)         | 1.30     | 0.003    |
| Average                                        | 19093 ( 6.69)       | 62 (15.50)          | 1    | REF      | 7636 ( 6.67)        | 425 (12.19)         | 1    | REF      | 7909 ( 6.80)        | 152 ( 9.13)         | 1        | REF      |
| Brisk                                          | 115773 (40.56)      | 118 (29.50)         | 0.70 | 0.002    | 46462 (40.59)       | 1162 (33.33)        | 0.80 | < 0.0001 | 47017 (40.43)       | 607 (36.46)         | 0.88     | 0.01     |
| Grip strength (Kg)                             | 30.85 (10.93)       | 31.45 (10.77)       | 1.06 | 0.27     | 30.84 (10.97)       | 27.03 ( 9.89)       | 0.69 | < 0.0001 | 30.74 (10.96)       | 29.51 (11.03)       | 0.89     | < 0.0001 |
| Prevalent disease at baseline, n (%)           |                     |                     |      |          |                     |                     |      |          |                     |                     |          |          |
| Longstanding illness                           | 82976 (29.07)       | 178 (44.50)         | 1.95 | < 0.0001 | 33970 (29.68)       | 1499 (43.00)        | 1.75 | < 0.0001 | 34867 (29.98)       | 602 (36.16)         | 1.32     | < 0.0001 |
| Diabetes                                       | 13621 ( 4.77)       | 37 ( 9.25)          | 2.03 | < 0.0001 | 5431 ( 4.74)        | 259 ( 7.43)         | 1.58 | < 0.0001 | 5582 ( 4.80)        | 108 ( 6.49)         | 1.37     | 0.001    |
| CVD                                            | 13777 ( 4.83)       | 42 (10.50)          | 2.31 | < 0.0001 | 5746 ( 5.02)        | 252 ( 7.23)         | 1.45 | < 0.0001 | 5896 ( 5.07)        | 102 ( 6.13)         | 1.22     | 0.052    |
| Cancer                                         | 19364 ( 6.80)       | 35 ( 8.86)          | 1.33 | 0.11     | 7763 ( 6.80)        | 301 ( 8.68)         | 1.29 | < 0.0001 | 7942 ( 6.85)        | 122 ( 7.36)         | 1.08     | 0.42     |
| Depression                                     | 54194 (18.99)       | 67 (16.75)          | 0.86 | 0.25     | 21590 (18.86)       | 619 (17.76)         | 0.93 | 0.10     | 21891 (18.83)       | 318 (19.10)         | 1.02     | 0.78     |
| CKD stages 3-5                                 | 352 ( 0.12)         | 3 ( 0.75)           | 6.08 | 0.002    | 143 ( 0.12)         | 9 ( 0.26)           | 2.01 | 0.03     | 148 ( 0.13)         | 4 ( 0.24)           | 1.87     | 0.21     |
| SLE                                            | 341 ( 0.12)         | 0 ( 0.00)           | -    | -        | 139 ( 0.12)         | 12 ( 0.34)          | 2.69 | 0.0005   | 147 ( 0.13)         | 4 ( 0.24)           | 1.88     | 0.20     |
| Asthma                                         | 31355 (10.99)       | 59 (14.75)          | 1.40 | 0.02     | 12363 (10.80)       | 661 (18.96)         | 1.89 | < 0.0001 | 12777 (10.99)       | 247 (14.83)         | 1.40     | < 0.0001 |
| Sleep apnoea                                   | 864 ( 0.30)         | 4 ( 1.00)           | 3.32 | 0.02     | 366 ( 0.32)         | 17 ( 0.49)          | 1.50 | 0.09     | 376 ( 0.32)         | 7 ( 0.42)           | 1.30     | 0.49     |
| COPD                                           | 607 ( 0.21)         | 3 ( 0.75)           | 3.53 | 0.03     | 246 ( 0.21)         | 26 ( 0.75)          | 3.25 | < 0.0001 | 261 ( 0.22)         | 11 ( 0.66)          | 2.88     | 0.0004   |
| Bronchitis                                     | 2919 ( 1.02)        | 9 ( 2.25)           | 2.22 | 0.02     | 1184 ( 1.03)        | 97 ( 2.78)          | 2.61 | < 0.0001 | 1245 ( 1.07)        | 36 ( 2.16)          | 2.01     | < 0.0001 |
| Pneumonia                                      | 3534 ( 1.24)        | 6 ( 1.50)           | 1.21 | 0.64     | 1339 ( 1.17)        | 50 ( 1.43)          | 1.22 | 0.15     | 1369 ( 1.18)        | 20 ( 1.20)          | 1.02     | 0.93     |
| Other respiratory disease                      | 1488 ( 0.52)        | 3 ( 0.75)           | 1.44 | 0.53     | 583 ( 0.51)         | 27 ( 0.77)          | 1.50 | 0.03     | 604 ( 0.52)         | 6 ( 0.36)           | 0.70     | 0.37     |
| Medication at baseline, n (%)                  |                     |                     |      |          |                     |                     |      |          |                     |                     |          |          |
| Statin                                         | 44152 (15.47)       | 98 (24.50)          | 1.77 | < 0.0001 | 18087 (15.80)       | 693 (19.88)         | 1.31 | < 0.0001 | 18490 (15.90)       | 290 (17.42)         | 1.11     | 0.09     |
| BP medication                                  | 45475 (15.93)       | 114 (28.50)         | 2.10 | < 0.0001 | 18487 (16.15)       | 633 (18.16)         | 1.15 | 0.002    | 18832 (16.19)       | 288 (17.30)         | 1.08     | 0.23     |
| Steroid                                        | 1070 ( 0.37)        | 2 ( 0.50)           | 1.33 | 0.68     | 414 ( 0.36)         | 28 ( 0.80)          | 2.15 | < 0.0001 | 437 ( 0.38)         | 5 ( 0.30)           | 0.80     | 0.62     |
| Biomarker at baseline                          |                     |                     |      |          |                     |                     |      |          |                     |                     |          |          |
| Total cholesterol (mmol/L)                     | 5.62 (4.91-6.33)    | 5.45 (4.70-6.20)    | 0.84 | 0.0003   | 5.62 (4.91-6.34)    | 5.53 (4.80-6.26)    | 0.92 | < 0.0001 | 5.62 (4.90-6.34)    | 5.51 (4.85-6.25)    | 0.93     | 0.001    |
| HDL cholesterol (mmol/L)                       | 1.40 (1.18-1.68)    | 1.29 (1.07-1.53)    | 0.69 | < 0.0001 | 1.40 (1.17-1.67)    | 1.42 (1.18-1.70)    | 1.05 | 0.005    | 1.40 (1.17-1.67)    | 1.37 (1.15-1.65)    | 0.94     | 0.009    |
| Cystatin C (mg/L)                              | 0.88 (0.80-0.97)    | 0.94 (0.86-1.05)    | 1.48 | < 0.0001 | 0.88 (0.80-0.97)    | 0.88 (0.80-0.99)    | 1.05 | 0.001    | 0.88 (0.80-0.97)    | 0.89 (0.80-0.99)    | 1.07     | 0.006    |
| HbA1c (mmol/mol)                               | 35.10 (32.60-37.70) | 36.20 (33.40-39.60) | 1.27 | < 0.0001 | 35.10 (32.60-37.60) | 35.60 (33.10-38.50) | 1.15 | < 0.0001 | 35.10 (32.60-37.70) | 35.30 (32.90-38.20) | 1.09     | < 0.0001 |
| CRP (mg/L)                                     | 1.26 (0.63-2.58)    | 1.70 (0.88-3.25)    | 1.15 | 0.0001   | 1.26 (0.63-2.59)    | 1.56 (0.78-3.27)    | 1.13 | < 0.0001 | 1.27 (0.63-2.60)    | 1.44 (0.70-3.05)    | 1.09     | < 0.0001 |
| Rheumatoid factor (IU/ml)                      | 3.16 (3.16-3.16)    | 3.16 (3.16-3.16)    | 0.98 | 0.71     | 3.16 (3.16-3.16)    | 3.16 (3.16-3.16)    | 1.03 | 0.04     | 3.16 (3.16-3.16)    | 3.16 (3.16-3.16)    | 1.05     | 0.03     |
| Red cell distribution width (%)                | 13.31 (12.90-13.81) | 13.38 (13.00-13.98) | 1.16 | 0.0006   | 13.30 (12.89-13.80) | 13.40 (12.91-13.94) | 1.11 | < 0.0001 | 13.30 (12.89-13.80) | 13.30 (12.90-13.81) | 1.02     | 0.31     |
| White cell count (10 <sup>9</sup> cells/Litre) | 6.60 (5.61-7.80)    | 6.83 (5.79-8.31)    | 1.20 | 0.0001   | 6.63 (5.64-7.80)    | 6.90 (5.83-8.20)    | 1.17 | < 0.0001 | 6.64 (5.65-7.81)    | 6.81 (5.70-8.10)    | 1.11     | < 0.0001 |
| Neutrophil count (10 <sup>9</sup> cells/Litre) | 4.00 (3.25-4.90)    | 4.10 (3.21-5.15)    | 1.11 | 0.03     | 4.01 (3.26-4.92)    | 4.20 (3.43-5.15)    | 1.15 | < 0.0001 | 4.01 (3.27-4.93)    | 4.13 (3.31-5.06)    | 1.08     | 0.0006   |
| Lymphocyte count (10 <sup>9</sup> cells/Litre) | 1.88 (1.52-2.29)    | 1.95 (1.58-2.44)    | 1.19 | 0.0002   | 1.88 (1.52-2.30)    | 1.92 (1.55-2.38)    | 1.10 | < 0.0001 | 1.88 (1.52-2.30)    | 1.92 (1.53-2.37)    | 1.08     | 0.001    |
| Monocyte count (10 <sup>9</sup> cells/Litre)   | 0.45 (0.36-0.56)    | 0.48 (0.38-0.60)    | 1.17 | 0.001    | 0.45 (0.36-0.57)    | 0.45 (0.37-0.56)    | 1.02 | 0.29     | 0.45 (0.36-0.56)    | 0.46 (0.37-0.58)    | 1.03     | 0.16     |

Numbers represent number (%) for categorical variables, mean (SD) for gaussian continuous variables, and median (25-75<sup>th</sup> percentiles) for skewed variables

\*Univariable relative risk ratio per 1 standard deviation for continuous variables and using comparator group for categorical variables.

†Evidence for non-linearity (see supplementary table 2)

**Supplementary table 2.** Sensitivity analysis for pneumonia occurring after 2015.

|                              | Pneumonia (after 2015) |               |      |          | Model 1           |          | Model 2           |        |
|------------------------------|------------------------|---------------|------|----------|-------------------|----------|-------------------|--------|
|                              | No<br>n=117181         | Yes<br>n=767  | RR   | P        | RR (95% CI)       | P        | RR (95% CI)       | P      |
| Mean (SD) Age                | 56.23 (8.09)           | 57.98 (8.01)  | 1.25 | < 0.0001 | 1.03 (1.02, 1.04) | < 0.0001 | 1.02 (1.01, 1.03) | 0.003  |
| Age categories               |                        |               |      |          |                   |          |                   |        |
| <50                          | 28874 (24.64)          | 133 (17.34)   | 1    | REF      | -                 | -        | -                 | -      |
| 50-54                        | 18191 (15.52)          | 95 (12.39)    | 1.13 | 0.35     | -                 | -        | -                 | -      |
| 55-59                        | 21085 (17.99)          | 157 (20.47)   | 1.61 | < 0.0001 | -                 | -        | -                 | -      |
| 60-64                        | 28142 (24.02)          | 193 (25.16)   | 1.49 | 0.0004   | -                 | -        | -                 | -      |
| ≥65                          | 20889 (17.83)          | 189 (24.64)   | 1.96 | < 0.0001 | -                 | -        | -                 | -      |
| Male                         | 53942 (46.03)          | 244 (31.81)   | 0.55 | < 0.0001 | 0.54 (0.47, 0.63) | < 0.0001 | 0.69 (0.57, 0.84) | 0.0001 |
| Ethnicity                    |                        |               |      |          |                   |          |                   |        |
| White                        | 111518 (95.17)         | 740 (96.48)   | 1    | REF      | 1 (Reference)     |          | 1 (Reference)     |        |
| Black                        | 1264 ( 1.08)           | 6 ( 0.78)     | 0.72 | 0.41     | 0.70 (0.31, 1.58) | 0.39     | 0.58 (0.26, 1.31) | 0.19   |
| South Asian                  | 2219 ( 1.89)           | 11 ( 1.43)    | 0.75 | 0.34     | 0.80 (0.44, 1.44) | 0.45     | 0.62 (0.34, 1.14) | 0.13   |
| Others                       | 2180 ( 1.86)           | 10 ( 1.30)    | 0.69 | 0.25     | 0.71 (0.38, 1.33) | 0.29     | 0.62 (0.33, 1.17) | 0.14   |
| Mean (SD) deprivation index  | -1.44 (2.92)           | -1.16 (3.05)  | 1.10 | 0.009    | 1.13 (1.05, 1.21) | 0.0006   | 1.07 (1.00, 1.15) | 0.07   |
| Current/former smoker        | 51809 (44.21)          | 369 (48.11)   | 1.17 | 0.03     | 1.07 (0.83, 1.38) | 0.59     | 1.12 (0.97, 1.30) | 0.11   |
| Alcohol drinking status      |                        |               |      |          |                   |          |                   |        |
| Never                        | 5005 ( 4.27)           | 45 ( 5.87)    | 1    | REF      | 1 (Reference)     |          | -                 | -      |
| Former                       | 3872 ( 3.30)           | 35 ( 4.56)    | 1.01 | 0.98     | 1.12 (0.54, 2.30) | 0.77     | -                 | -      |
| Current                      | 108304 (92.42)         | 687 (89.57)   | 0.71 | 0.02     | 0.70 (0.42, 1.18) | 0.18     | -                 | -      |
| Mean (SD) BMI                | 27.37 (4.61)           | 28.14 (5.06)  | 1.17 | < 0.0001 | 1.21 (1.09, 1.35) | 0.0005   | 1.09 (1.02, 1.17) | 0.01   |
| BMI categories               |                        |               |      |          |                   |          |                   |        |
| Underweight                  | 488 ( 0.42)            | 3 ( 0.39)     | 1.02 | 0.97     | 0.91 (0.13, 6.58) | 0.93     | -                 | -      |
| Normal                       | 38339 (32.72)          | 231 (30.12)   | 1    | REF      | 1 (Reference)     |          | -                 | -      |
| Overweight                   | 50197 (42.84)          | 309 (40.29)   | 1.02 | 0.81     | 1.04 (0.77, 1.41) | 0.78     | -                 | -      |
| Obese                        | 28157 (24.03)          | 224 (29.20)   | 1.32 | 0.003    | 1.35 (0.98, 1.86) | 0.06     | -                 | -      |
| Mean (SD) Body fat-free mass | 53.44 (11.48)          | 50.83 (10.97) | 0.79 | < 0.0001 | 1.29 (1.02, 1.62) | 0.03     | -                 | -      |
| Mean (SD) Body fat mass      | 24.67 (9.27)           | 27.01 (9.95)  | 1.25 | < 0.0001 | 1.22 (1.09, 1.37) | 0.0007   | -                 | -      |

|                                    |                  |                  |      |          |                   |          |                   |          |
|------------------------------------|------------------|------------------|------|----------|-------------------|----------|-------------------|----------|
| Mean (SD) Body fat percent         | 31.27 (8.44)     | 34.22 (8.21)     | 1.41 | < 0.0001 | 1.30 (1.10, 1.54) | 0.002    | -                 | -        |
| Mean (SD) Systolic blood pressure  | 137.45 (18.19)   | 137.12 (18.19)   | 0.98 | 0.62     | 0.94 (0.82, 1.07) | 0.33     | -                 | -        |
| Mean (SD) Diastolic blood pressure | 82.13 (9.93)     | 81.49 (9.78)     | 0.94 | 0.07     | 0.93 (0.82, 1.06) | 0.29     | -                 | -        |
| Mean (SD) FEV1                     | 2.75 (0.77)      | 2.46 (0.74)      | 0.67 | < 0.0001 | 0.69 (0.58, 0.83) | < 0.0001 | 0.79 (0.71, 0.87) | < 0.0001 |
| Mean (SD) FVC                      | 3.63 (0.99)      | 3.28 (0.92)      | 0.68 | < 0.0001 | 0.73 (0.61, 0.88) | 0.0007   | -                 | -        |
| Mean (SD) FEV1/FVC                 | 0.76 (0.07)      | 0.75 (0.08)      | 0.89 | 0.0003   | 0.86 (0.77, 0.97) | 0.01     | -                 | -        |
| Walking pace                       |                  |                  |      |          |                   |          |                   |          |
| Slow                               | 61857 (52.79)    | 406 (52.93)      | 1.90 | < 0.0001 | 1.74 (1.20, 2.53) | 0.004    | 1.55 (1.23, 1.94) | 0.0002   |
| Average                            | 7961 ( 6.79)     | 100 (13.04)      | 1    | REF      | 1 (Reference)     |          | 1 (Reference)     |          |
| Brisk                              | 47363 (40.42)    | 261 (34.03)      | 0.84 | 0.03     | 0.81 (0.61, 1.06) | 0.12     | 0.97 (0.82, 1.14) | 0.69     |
| Mean (SD) grip strength            | 30.75 (10.96)    | 27.34 (10.22)    | 0.72 | < 0.0001 | 0.90 (0.73, 1.10) | 0.31     | 1.02 (0.83, 1.26) | 0.82     |
| Prevalent disease at baseline      |                  |                  |      |          |                   |          |                   |          |
| Longstanding illness               | 35153 (30.00)    | 316 (41.20)      | 1.63 | < 0.0001 | 1.58 (1.23, 2.03) | 0.0004   | 1.36 (1.04, 1.77) | 0.02     |
| Diabetes                           | 5634 ( 4.81)     | 56 ( 7.30)       | 1.55 | 0.001    | 2.03 (1.33, 3.10) | 0.0010   | 1.62 (1.05, 2.51) | 0.03     |
| CVD                                | 5938 ( 5.07)     | 60 ( 7.82)       | 1.58 | 0.0006   | 1.52 (0.96, 2.41) | 0.07     | 1.26 (0.79, 2.02) | 0.33     |
| Cancer                             | 7993 ( 6.84)     | 71 ( 9.34)       | 1.40 | 0.007    | 1.52 (1.03, 2.24) | 0.03     | 1.51 (1.02, 2.22) | 0.04     |
| Depression                         | 22088 (18.85)    | 121 (15.78)      | 0.81 | 0.03     | 0.70 (0.49, 0.99) | 0.045    | 0.74 (0.51, 1.05) | 0.09     |
| Asthma                             | 12881 (10.99)    | 143 (18.64)      | 1.85 | < 0.0001 | 1.38 (0.98, 1.96) | 0.07     | 1.21 (0.85, 1.72) | 0.29     |
| COPD                               | 268 ( 0.23)      | 4 ( 0.52)        | 2.27 | 0.10     | 1.37 (0.19, 9.85) | 0.75     | 0.90 (0.12, 6.60) | 0.92     |
| Bronchitis                         | 1261 ( 1.08)     | 20 ( 2.61)       | 2.44 | < 0.0001 | 1.86 (0.82, 4.19) | 0.14     | 1.46 (0.64, 3.35) | 0.37     |
| Pneumonia                          | 1374 ( 1.17)     | 15 ( 1.96)       | 1.67 | 0.047    | 1.58 (0.65, 3.85) | 0.31     | 1.50 (0.61, 3.66) | 0.37     |
| Other respiratory disease          | 604 ( 0.52)      | 6 ( 0.78)        | 1.52 | 0.31     | 0.70 (0.10, 5.01) | 0.72     | 0.64 (0.09, 4.62) | 0.66     |
| Medication at baseline             |                  |                  |      |          |                   |          |                   |          |
| Statin                             | 18618 (15.89)    | 162 (21.12)      | 1.41 | < 0.0001 | 1.04 (0.75, 1.45) | 0.81     | 0.90 (0.64, 1.26) | 0.53     |
| BP medication                      | 18975 (16.19)    | 145 (18.90)      | 1.20 | 0.04     | 0.97 (0.69, 1.37) | 0.86     | 0.84 (0.59, 1.19) | 0.32     |
| Steroid                            | 436 ( 0.37)      | 6 ( 0.78)        | 2.10 | 0.07     | 1.94 (0.48, 7.82) | 0.35     | 1.72 (0.42, 7.01) | 0.45     |
| Median (IQR) Biomarker at baseline |                  |                  |      |          |                   |          |                   |          |
| Total cholesterol                  | 5.62 (4.90-6.34) | 5.58 (4.81-6.28) | 0.95 | 0.19     | 0.94 (0.83, 1.06) | 0.33     | 0.97 (0.86, 1.10) | 0.64     |

|                             |                     |                     |      |          |                   |        |                   |      |
|-----------------------------|---------------------|---------------------|------|----------|-------------------|--------|-------------------|------|
| HDL cholesterol             | 1.40 (1.17-1.67)    | 1.40 (1.17-1.70)    | 1.04 | 0.27     | 0.89 (0.77, 1.02) | 0.08   | 0.97 (0.84, 1.12) | 0.71 |
| Cystatin C                  | 0.88 (0.80-0.97)    | 0.90 (0.81-1.01)    | 1.18 | < 0.0001 | 1.16 (1.03, 1.31) | 0.01   | 1.06 (0.93, 1.21) | 0.36 |
| HbA1c                       | 35.10 (32.60-37.70) | 35.80 (33.50-38.55) | 1.17 | < 0.0001 | 1.17 (1.06, 1.30) | 0.001  | 1.10 (0.99, 1.23) | 0.07 |
| CRP                         | 1.27 (0.63-2.60)    | 1.56 (0.83-3.16)    | 1.13 | < 0.0001 | 1.12 (1.02, 1.23) | 0.02   | 1.04 (0.93, 1.16) | 0.47 |
| Rheumatoid factor           | 3.16 (3.16-3.16)    | 3.16 (3.16-3.16)    | 1.04 | 0.26     | 1.03 (0.92, 1.14) | 0.63   | 1.02 (0.92, 1.14) | 0.71 |
| Red cell distribution width | 13.30 (12.89-13.80) | 13.38 (12.95-13.92) | 1.09 | 0.007    | 1.12 (1.01, 1.25) | 0.04   | 1.08 (0.97, 1.21) | 0.18 |
| White cell count            | 6.64 (5.65-7.81)    | 7.04 (5.90-8.17)    | 1.20 | < 0.0001 | 1.22 (1.09, 1.37) | 0.0006 | 1.14 (1.01, 1.29) | 0.03 |
| Neutrophil count            | 4.01 (3.27-4.93)    | 4.23 (3.51-5.19)    | 1.16 | < 0.0001 | 1.15 (1.02, 1.29) | 0.02   | 1.08 (0.96, 1.22) | 0.22 |
| Lymphocyte count            | 1.88 (1.52-2.30)    | 1.92 (1.60-2.38)    | 1.12 | 0.0006   | 1.16 (1.04, 1.30) | 0.01   | 1.11 (0.98, 1.25) | 0.09 |
| Monocyte count              | 0.45 (0.36-0.56)    | 0.47 (0.37-0.58)    | 1.09 | 0.02     | 1.16 (1.03, 1.31) | 0.02   | 1.11 (0.98, 1.25) | 0.11 |

Variables with associations denoted “-“ are excluded from the model due to non-significance in previous model and /or collinearity with another variable.

Model 1 adjusts for age, sex, ethnicity, deprivation

Model 2 adjusted for model 1 plus body fat %, FEV1, and walking pace

**Supplementary table 3.** Linearity of continuous variables with COVID-19 and influenza.

| Exposures                   | Covid-19 |      |                        | Pneumonia (after 2016) |      |                        | Influenza (after 2016) |      |                        |
|-----------------------------|----------|------|------------------------|------------------------|------|------------------------|------------------------|------|------------------------|
|                             | $\chi^2$ | df   | P <sub>nonlinear</sub> | $\chi^2$               | df   | P <sub>nonlinear</sub> | $\chi^2$               | df   | P <sub>nonlinear</sub> |
| Age                         | 11.25    | 1.97 | 0.003                  | 5.10                   | 2.00 | 0.08                   | 0.74                   | 2.00 | 0.69                   |
| Deprivation index           | 0.01     | 0.05 | 0.12                   | 2.96                   | 2.00 | 0.23                   | 1.01                   | 1.99 | 0.60                   |
| BMI                         | 0.33     | 1.62 | 0.77                   | 2.31                   | 2.00 | 0.31                   | 0.00                   | 0.03 | 0.08                   |
| Body fat-free mass          | 3.83     | 1.99 | 0.15                   | 7.19                   | 1.93 | 0.03                   | 0.99                   | 2.00 | 0.61                   |
| Body fat mass               | 0.01     | 0.04 | 0.11                   | 1.44                   | 1.99 | 0.48                   | 1.81                   | 2.00 | 0.40                   |
| Body fat percent            | 4.75     | 1.99 | 0.09                   | 0.74                   | 1.97 | 0.68                   | 0.96                   | 1.91 | 0.60                   |
| Systolic blood pressure     | 0.00     | 0.03 | 0.09                   | 1.96                   | 1.98 | 0.37                   | 2.89                   | 2.00 | 0.24                   |
| Diastolic blood pressure    | 0.96     | 1.97 | 0.61                   | 1.08                   | 1.99 | 0.58                   | 2.25                   | 1.98 | 0.32                   |
| FEV1                        | 1.20     | 1.99 | 0.55                   | 8.78                   | 1.94 | 0.01                   | 3.93                   | 1.96 | 0.13                   |
| FVC                         | 3.52     | 1.99 | 0.17                   | 6.61                   | 1.84 | 0.03                   | 1.29                   | 1.93 | 0.51                   |
| FEV1/FVC                    | 0.01     | 0.05 | 0.11                   | 9.86                   | 1.96 | 0.007                  | 0.00                   | 0.04 | 0.11                   |
| Grip strength               | 6.95     | 1.99 | 0.03                   | 1.93                   | 1.90 | 0.36                   | 0.29                   | 1.76 | 0.82                   |
| Biomarker at baseline       |          |      |                        |                        |      |                        |                        |      |                        |
| Total cholesterol           | 10.34    | 2.00 | 0.006                  | 0.67                   | 1.98 | 0.71                   | 2.15                   | 2.00 | 0.34                   |
| HDL cholesterol             | 0.00     | 0.02 | 0.06                   | 1.31                   | 1.96 | 0.51                   | 1.51                   | 1.91 | 0.45                   |
| Cystatin C                  | 0.01     | 0.06 | 0.13                   | 1.06                   | 1.97 | 0.58                   | 0.00                   | 0.04 | 0.11                   |
| HbA1c                       | 9.83     | 2.00 | 0.007                  | 4.34                   | 1.95 | 0.11                   | 5.62                   | 2.00 | 0.06                   |
| CRP                         | 9.53     | 2.00 | 0.008                  | 5.42                   | 1.99 | 0.07                   | 0.64                   | 2.00 | 0.73                   |
| Rheumatoid factor           | 3.14     | 2.00 | 0.21                   | 4.66                   | 1.99 | 0.10                   | 0.58                   | 1.97 | 0.74                   |
| Red cell distribution width | 0.88     | 1.82 | 0.60                   | 4.15                   | 2.00 | 0.12                   | 3.37                   | 1.99 | 0.18                   |
| White cell count            | 1.96     | 2.00 | 0.38                   | 2.63                   | 1.99 | 0.27                   | 0.00                   | 0.03 | 0.07                   |
| Neutrophil count            | 1.52     | 2.00 | 0.47                   | 2.39                   | 1.98 | 0.30                   | 0.37                   | 1.95 | 0.82                   |
| Lymphocyte count            | 7.21     | 1.99 | 0.03                   | 1.05                   | 1.93 | 0.58                   | 12.73                  | 2.00 | 0.002                  |
| Monocyte count              | 0.00     | 0.03 | 0.11                   | 0.47                   | 1.87 | 0.76                   | 5.94                   | 1.90 | 0.046                  |



**Supplementary table 4.** Association of risk factors for COVID-19 and pneumonia in UK Biobank with body fat percent replacing BMI in Model 2

|                               | COVID-19          |          | Pneumonia (after 2016) |        |
|-------------------------------|-------------------|----------|------------------------|--------|
|                               | RR (95% CI)       | P        | RR (95% CI)            | P      |
| Age                           | 1.02 (1.00, 1.03) | 0.06     | 1.02 (1.00, 1.03)      | 0.08   |
| Male                          | 2.63 (1.85, 3.73) | < 0.0001 | 1.05 (0.71, 1.55)      | 0.82   |
| Ethnicity                     |                   |          |                        |        |
| White                         | 1 (Reference)     |          | 1 (Reference)          |        |
| Black                         | 1.88 (1.04, 3.40) | 0.04     | 1.09 (0.39, 3.01)      | 0.87   |
| South Asian                   | 1.04 (0.48, 2.26) | 0.92     | 0.74 (0.29, 1.85)      | 0.52   |
| Others                        | 1.57 (0.88, 2.78) | 0.13     | 0.36 (0.09, 1.47)      | 0.15   |
| Deprivation index             | 1.26 (1.14, 1.40) | < 0.0001 | 1.08 (0.95, 1.22)      | 0.23   |
| Current/former smoker         | 1.37 (1.10, 1.72) | 0.005    | 1.02 (0.79, 1.31)      | 0.87   |
| Body fat percent              | 1.40 (1.19, 1.65) | < 0.0001 | 1.18 (0.99, 1.41)      | 0.07   |
| Diastolic blood pressure      | 1.05 (0.94, 1.17) | 0.40     | -                      | -      |
| FEV1                          | 0.90 (0.78, 1.04) | 0.17     | 0.73 (0.61, 0.88)      | 0.0007 |
| Walking pace                  |                   |          |                        |        |
| Slow                          | 1.70 (1.24, 2.35) | 0.001    | 1.51 (1.02, 2.22)      | 0.04   |
| Average                       | 1 (Reference)     |          | 1 (Reference)          |        |
| Brisk                         | 1.01 (0.79, 1.30) | 0.93     | 0.90 (0.68, 1.20)      | 0.49   |
| grip strength                 | 0.94 (0.80, 1.11) | 0.48     | 1.04 (0.84, 1.28)      | 0.72   |
| Prevalent disease at baseline |                   |          |                        |        |
| Longstanding illness          | 1.38 (1.09, 1.74) | 0.007    | 1.36 (1.04, 1.77)      | 0.02   |
| Diabetes                      | 1.24 (0.85, 1.82) | 0.27     | 1.66 (1.08, 2.56)      | 0.02   |
| CVD                           | 1.36 (0.93, 1.99) | 0.11     | 1.27 (0.79, 2.02)      | 0.32   |
| Cancer                        | 1.34 (0.92, 1.95) | 0.13     | 1.50 (1.02, 2.22)      | 0.04   |
| Depression                    | 1.15 (0.87, 1.52) | 0.33     | 0.74 (0.51, 1.05)      | 0.09   |
| Asthma                        | 1.20 (0.88, 1.65) | 0.25     | 1.21 (0.85, 1.72)      | 0.28   |
| COPD                          | 1.45 (0.35, 5.96) | 0.61     | 0.89 (0.12, 6.50)      | 0.91   |
| Bronchitis                    | 1.51 (0.73, 3.09) | 0.26     | 1.45 (0.64, 3.32)      | 0.38   |
| Pneumonia                     | 1.08 (0.44, 2.63) | 0.87     | 1.50 (0.61, 3.65)      | 0.38   |
| Other respiratory disease     | 1.40 (0.44, 4.42) | 0.57     | 0.63 (0.09, 4.59)      | 0.65   |
| Medication at baseline        |                   |          |                        |        |
| Statin                        | 1.24 (0.95, 1.62) | 0.11     | 0.90 (0.64, 1.27)      | 0.55   |
| BP medication                 | 1.41 (1.09, 1.83) | 0.009    | 0.85 (0.59, 1.20)      | 0.35   |
| Steroid                       | 1.23 (0.30, 5.01) | 0.77     | 1.71 (0.42, 6.97)      | 0.45   |
| Biomarker                     |                   |          |                        |        |
| Total cholesterol             | 0.89 (0.80, 0.99) | 0.03     | 0.96 (0.85, 1.09)      | 0.56   |
| HDL cholesterol               | 0.82 (0.72, 0.94) | 0.005    | 0.96 (0.84, 1.11)      | 0.63   |
| Cystatin C                    | 1.24 (1.12, 1.37) | < 0.0001 | 1.07 (0.94, 1.22)      | 0.31   |
| HbA1c                         | 1.12 (1.03, 1.22) | 0.007    | 1.11 (1.00, 1.23)      | 0.051  |
| CRP                           | 1.04 (0.94, 1.14) | 0.46     | 1.04 (0.94, 1.16)      | 0.43   |
| Rheumatoid factor             | 0.97 (0.86, 1.09) | 0.57     | 1.02 (0.92, 1.14)      | 0.72   |
| Red cell distribution width   | 1.05 (0.94, 1.16) | 0.40     | 1.09 (0.97, 1.21)      | 0.15   |
| White cell count              | 1.07 (0.97, 1.19) | 0.18     | 1.15 (1.02, 1.29)      | 0.03   |
| Neutrophil count              | 1.02 (0.91, 1.13) | 0.78     | 1.08 (0.96, 1.22)      | 0.21   |
| Lymphocyte count              | 1.10 (0.99, 1.22) | 0.07     | 1.11 (0.99, 1.25)      | 0.08   |
| Monocyte count                | 1.04 (0.93, 1.15) | 0.50     | 1.11 (0.98, 1.25)      | 0.10   |

Variables with associations denoted “-” are excluded from the model due to non-significance in previous model and /or collinearity with another variable. SLE and CKD also omitted due to low numbers of baseline cases.

Model 2 adjusted for age, sex, ethnicity, deprivation, body fat %, FEV1, and walking pace (and also DBP for COV-19 only)

Supplementary Figure 1. CONSORT diagram.

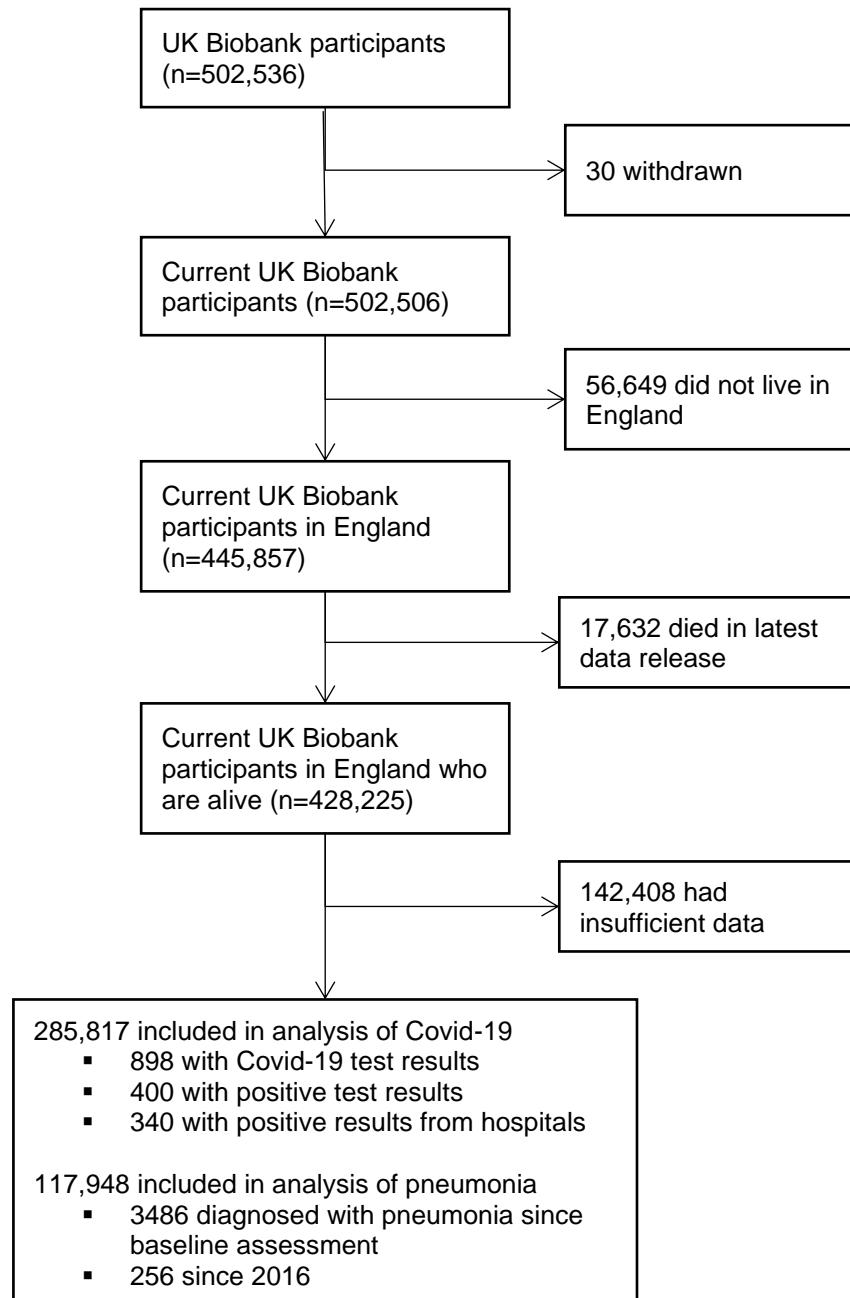

Supplement: Supplementary file [file 2020.04.28.20083295-1.pdf]
